# Supplementary material for: Molecular Evolutionary Analyses of the Spike Protein Gene and Spike Protein in the SARS-CoV-2 Omicron Subvariants
Source: MDPI journal article supplement (doi:10.3390/microorganisms11092336), 2023-09-18
Supplement: s1 [file s1]

|         | Protein   | Predicted epitopes      |                                                                                                        |
|---------|-----------|-------------------------|--------------------------------------------------------------------------------------------------------|
| BA.2    | 14-19     | QCVNLR                  | <b>BA.2</b><br>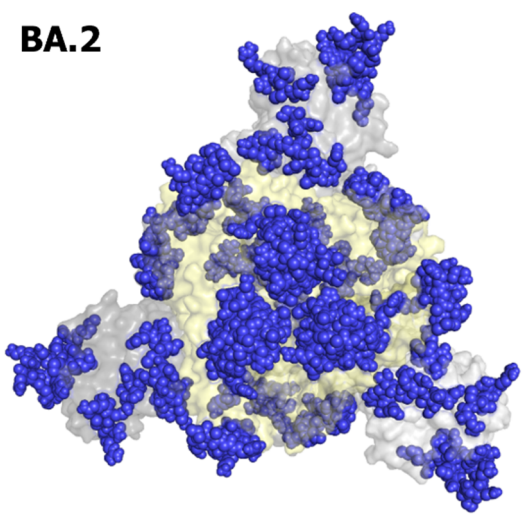      |
|         | 109114    | TLDSKT                  |                                                                                                        |
|         | 144-154   | YYHKNNKSWME             |                                                                                                        |
|         | 160-169   | YSSANNCTFE              |                                                                                                        |
|         | 177-185   | MDLEGKQGN               |                                                                                                        |
|         | 436-452   | WNSNKLDISKVGGNYNYL      |                                                                                                        |
|         | 458-460   | KSN                     |                                                                                                        |
|         | 474-488   | QAGNKPCNGVAGFNC         |                                                                                                        |
|         | 493-496   | RSYG                    |                                                                                                        |
|         | 498-506   | RPTYGVGHQ               |                                                                                                        |
|         | 553-563   | TESNKKFLPFQ             |                                                                                                        |
|         | 582-584   | LEI                     |                                                                                                        |
|         | 703-705   | NSV                     |                                                                                                        |
|         | 809-812   | PSKP                    |                                                                                                        |
|         | 834-842   | IKQYGDCLG               |                                                                                                        |
|         | 890-897   | AGAALQIP                |                                                                                                        |
|         | 912-914   | TQN                     |                                                                                                        |
|         | 917-919   | YEN                     |                                                                                                        |
|         | 1140-1162 | PLQPELDSFKEELDKYFKNHTSP |                                                                                                        |
| BA.2.10 | 15-17     | CVN                     | <b>BA.2.10</b><br>  |
|         | 146-151   | HKNNKS                  |                                                                                                        |
|         | 180-185   | EGKQGN                  |                                                                                                        |
|         | 343-346   | NATR                    |                                                                                                        |
|         | 415-417   | TGN                     |                                                                                                        |
|         | 436-452   | WNSNKLDISKVGGNYNYL      |                                                                                                        |
|         | 455-460   | LFRKSN                  |                                                                                                        |
|         | 468-472   | ISTEI                   |                                                                                                        |
|         | 474-488   | QAGNKPCNGVAGFNC         |                                                                                                        |
|         | 490-496   | FPLRSYG                 |                                                                                                        |
|         | 498-506   | RPTYGVGHQ               |                                                                                                        |
|         | 553-563   | TESNKKFLPFQ             |                                                                                                        |
|         | 703-705   | NSV                     |                                                                                                        |
|         | 809-812   | PSKP                    |                                                                                                        |
|         | 834-843   | IKQYGDCLGD              |                                                                                                        |
|         | 890-895   | AGAALQ                  |                                                                                                        |
|         | 1140-1162 | PLQPELDSFKEELDKYFKNHTSP |                                                                                                        |
| BA.2.75 | 146-151   | HENNKS                  | <b>BA.2.75</b><br> |
|         | 172-175   | SQPE                    |                                                                                                        |
|         | 180-185   | EGKQGN                  |                                                                                                        |
|         | 343-346   | NATR                    |                                                                                                        |
|         | 415-417   | YGN                     |                                                                                                        |
|         | 436-452   | WNSNKLDISKVSGNYNYL      |                                                                                                        |
|         | 455-460   | LFRKSK                  |                                                                                                        |
|         | 468-506   | ISTEIQAGNKPCNGVAGFN     |                                                                                                        |
|         |           | CYFPLQSYGFRPTYGVGHQ     |                                                                                                        |
|         | 555-561   | SNKKFLP                 |                                                                                                        |
|         | 703-705   | NSV                     |                                                                                                        |
|         | 808-813   | DPSKPS                  |                                                                                                        |
|         | 836-842   | QYGDCLG                 |                                                                                                        |
|         | 890-895   | AGAALQ                  |                                                                                                        |
|         | 912-914   | TQN                     |                                                                                                        |
|         | 917-919   | YEN                     |                                                                                                        |
|         | 1070-1074 | AQEKNN                  |                                                                                                        |
|         | 1140-1162 | PLQPELDSFKEELDKYFKNHTSP |                                                                                                        |

|      |           |                         |             |                                                                                      |
|------|-----------|-------------------------|-------------|--------------------------------------------------------------------------------------|
| BA.4 | 108-114   | TTLDSKT                 | <b>BA.4</b> | 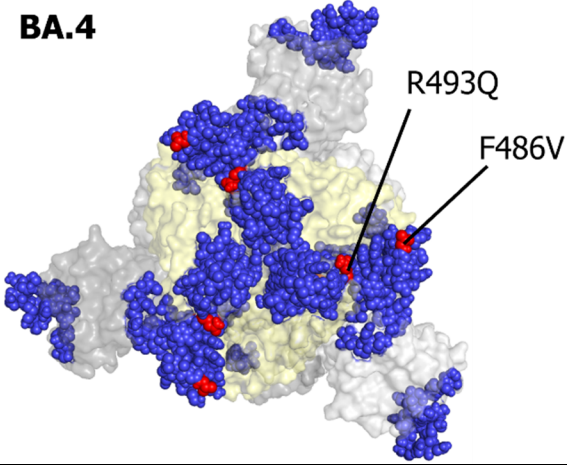    |
|      | 142-152   | DVYYHKNNKSW             |             |                                                                                      |
|      | 164-167   | NNCT                    |             |                                                                                      |
|      | 182-185   | KQGN                    |             |                                                                                      |
|      | 254-256   | SSS                     |             |                                                                                      |
|      | 415-417   | TGN                     |             |                                                                                      |
|      | 437-450   | NSNKLDSKVGGNYN          |             |                                                                                      |
|      | 455-460   | LFRKSN                  |             |                                                                                      |
|      | 468-494   | ISTEIQAGNKPCNGVAGV      |             |                                                                                      |
|      |           | NCYFPLQS                |             |                                                                                      |
|      | 497-506   | FRPTYGVGHQ              |             |                                                                                      |
|      | 703-705   | NSV                     |             |                                                                                      |
|      | 836-841   | QYGDCL                  |             |                                                                                      |
|      | 890-895   | AGAALQ                  |             |                                                                                      |
|      | 1140-1162 | PLQPELDSFKEELDKYFKNHTSP |             |                                                                                      |
| BA.5 | 14-17     | QCVN                    | <b>BA.5</b> |   |
|      | 19-21     | ITR                     |             |                                                                                      |
|      | 109-114   | TLDSKT                  |             |                                                                                      |
|      | 134-137   | QFCN                    |             |                                                                                      |
|      | 145-152   | YHKNNKSW                |             |                                                                                      |
|      | 160-167   | YSSANNCT                |             |                                                                                      |
|      | 182-185   | KQGN                    |             |                                                                                      |
|      | 254-259   | SSSGWT                  |             |                                                                                      |
|      | 443-450   | SKVGGNYN                |             |                                                                                      |
|      | 457-460   | RKSN                    |             |                                                                                      |
|      | 472-489   | IYQAGNKPCNGVAGVNCY      |             |                                                                                      |
|      | 496-506   | GFRPTYGVGHQ             |             |                                                                                      |
|      | 554-561   | ESNKKFLP                |             |                                                                                      |
|      | 703-705   | NSV                     |             |                                                                                      |
|      | 809-812   | PSKP                    |             |                                                                                      |
|      | 836-841   | QYGDCL                  |             |                                                                                      |
|      | 890-897   | AGAALQIP                |             |                                                                                      |
|      | 912-914   | TQN                     |             |                                                                                      |
|      | 917-919   | YEN                     |             |                                                                                      |
|      | 1070-1074 | AQEKD                   |             |                                                                                      |
|      | 1140-1162 | PLQPELDSFKEELDKYFKNHTSL |             |                                                                                      |
| BJ.1 | 147-151   | KNNKS                   | <b>BJ.1</b> |  |
|      | 163-167   | ANNCT                   |             |                                                                                      |
|      | 182-185   | KEGN                    |             |                                                                                      |
|      | 415-417   | TGN                     |             |                                                                                      |
|      | 437-452   | NSNKLDSKPSGNYNYL        |             |                                                                                      |
|      | 455-460   | LFRKSN                  |             |                                                                                      |
|      | 468-472   | ISTEI                   |             |                                                                                      |
|      | 474-489   | QAGNKPCNGAAGFNCY        |             |                                                                                      |
|      | 491-506   | PLRSYGFRPTYGVGHQ        |             |                                                                                      |
|      | 703-705   | NSV                     |             |                                                                                      |
|      | 809-812   | PSKP                    |             |                                                                                      |
|      | 836-842   | QYGDCLG                 |             |                                                                                      |
|      | 890-896   | AGAALQI                 |             |                                                                                      |
|      | 1140-1162 | PLQPELDSFKEELDKYFKNHTSP |             |                                                                                      |

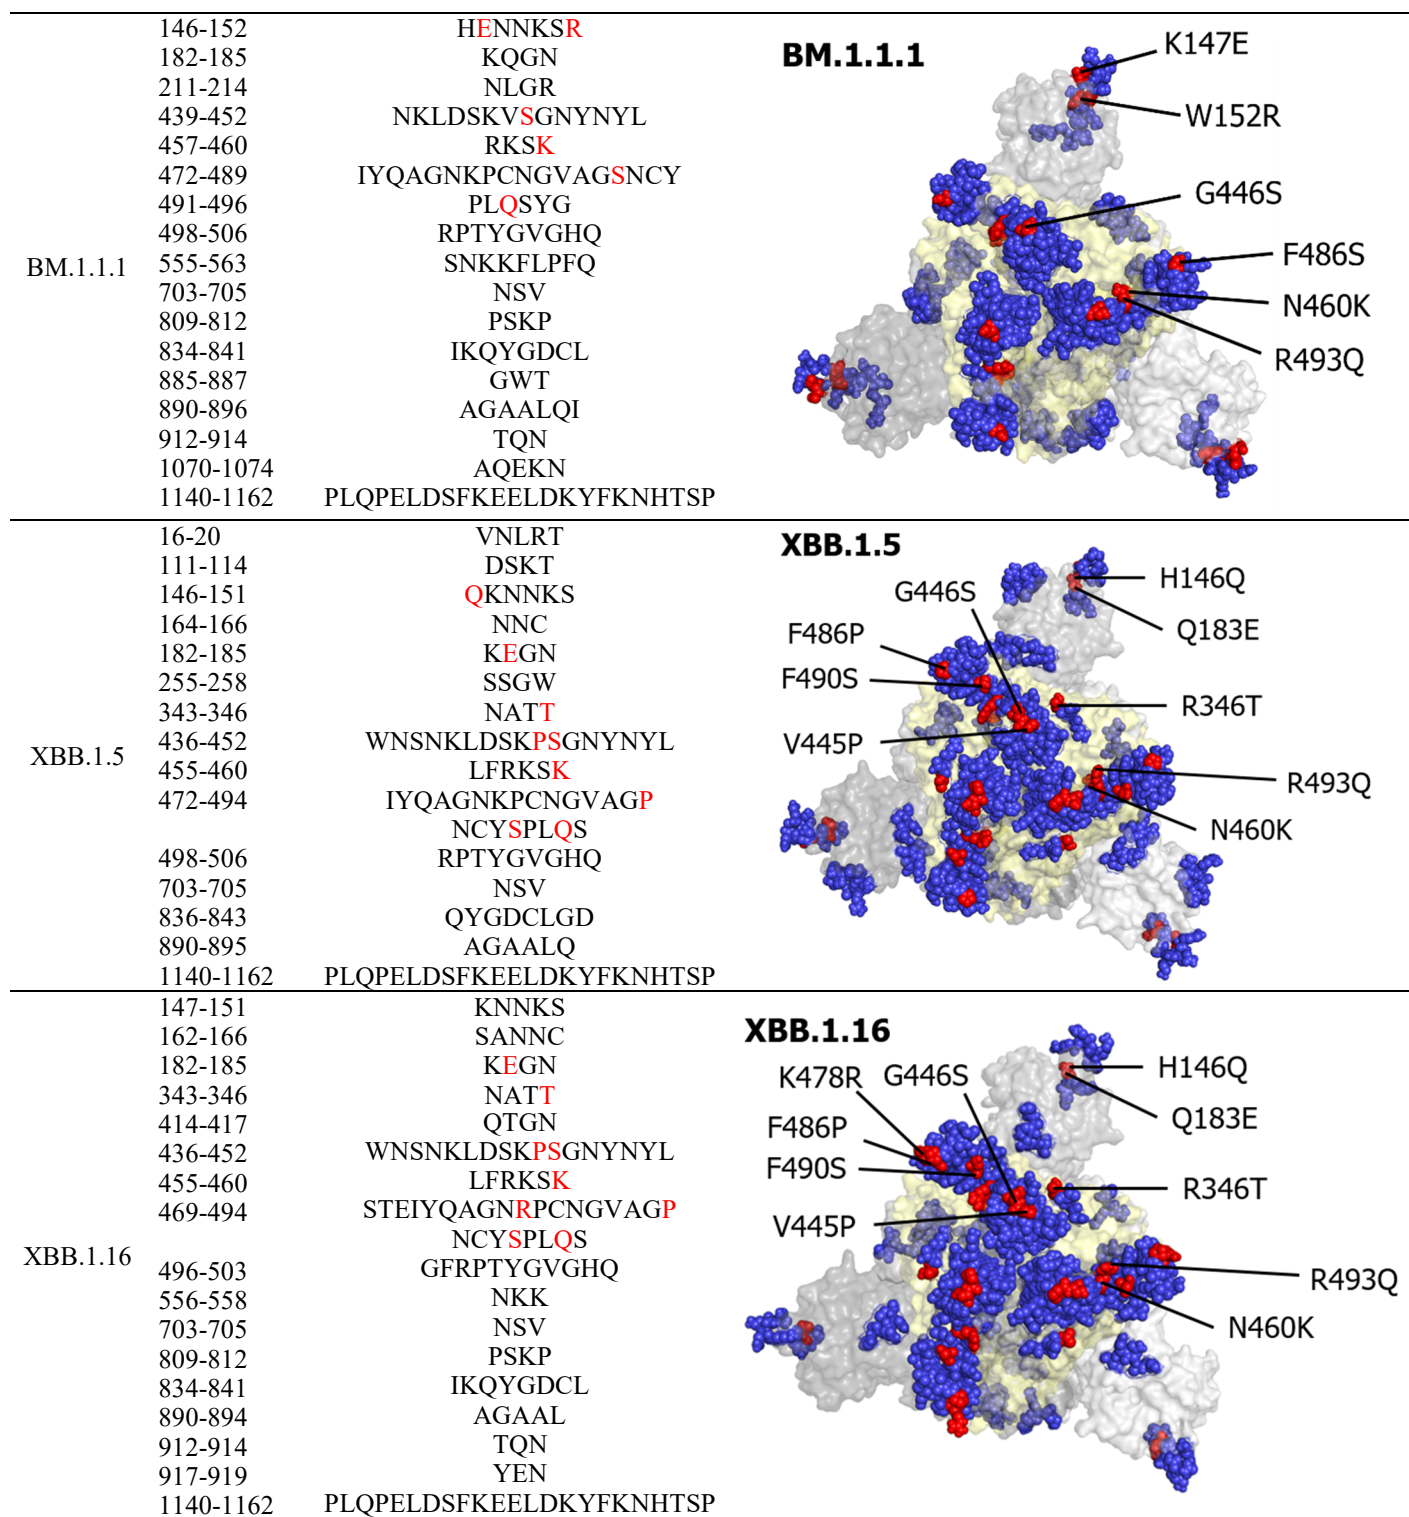

**Figure S1.** Conformational epitopes and mutation mapped on three-dimensional structure models of the SARS-CoV-2 variants in the S protein. The results of the conformational epitope analysis of the SARS-CoV-2 mutant and the mapping of the predicted conformational epitopes and mutation sites on the conformational model of the SARS-CoV-2 S protein are shown. Amino acids mutated from BA.2 on the predicted epitope are indicated in red letters. The chains of the trimeric structure are color-coded in dark gray (chain A), gray (chain B), and light gray (chain C). Conformational epitopes, mutations on conformational epitopes, and RBDs are shown in blue, red, and light yellow, respectively.
